# Supplementary material for: Potential Role of Ocular Microbiome, Host Genotype, Tear Cytokines, and Environmental Factors in Corneal Infiltrative Events in Contact Lens Wearers
Source: PubMed Central journal article supplement — Invest Ophthalmol Vis Sci. 2018 Dec;59(15):5752–61. doi: 10.1167/iovs.18-24845 (PMC6281277; doi:10.1167/iovs.18-24845), 2018-12
Supplement: iovs-59-13-06_s01.pdf [file iovs-59-13-06_s01.pdf]

**Supplementary tables**

Table S1. Absolute levels of 16S bacterial rDNA results for negative control samples, control subjects and case subjects.

| <b>Negative Controls</b>       |             |             |             |             |             |             |             |             |             |
|--------------------------------|-------------|-------------|-------------|-------------|-------------|-------------|-------------|-------------|-------------|
| <b>Genus</b>                   | <b>N1</b>   | <b>N2</b>   | <b>N3</b>   | <b>N4</b>   | <b>N5</b>   | <b>N6</b>   | <b>N7</b>   |             |             |
| <i>Staphylococcus spp.</i>     | 1           | 310         | 51          | 3           | 2616        | 225         | 3           |             |             |
| <i>Neisseria spp.</i>          | 1           | 0           | 0           | 0           | 0           | 0           | 1           |             |             |
| <i>Propionibacterium acnes</i> | 6           | 62          | 2           | 151         | 1454        | 328         | 927         |             |             |
| <i>Streptococcus spp.</i>      | 1           | 0           | 0           | 1           | 1           | 0           | 0           |             |             |
| <i>Corynebacterium spp.</i>    | 1           | 35          | 130         | 0           | 403         | 0           | 2           |             |             |
| <i>Pseudomonas spp.</i>        | 463         | 258         | 699         | 127         | 480         | 382         | 1,736       |             |             |
| <b>Case</b>                    |             |             |             |             |             |             |             |             |             |
|                                | <b>M101</b> | <b>M102</b> | <b>M103</b> | <b>M105</b> | <b>M106</b> | <b>M107</b> | <b>M108</b> | <b>M111</b> | <b>M115</b> |
| <i>Staphylococcus spp.</i>     | 116,614     | 3,002       | 118,892     | 5,304       | 3,828       | 4,076       | 5,899       | 4,811       | 87,953      |
| <i>Neisseria spp.</i>          | 562,126     | 41          | 3,260       | 10,821      | 4,186       | 117         | 201,193     | 2,474       | 0           |
| <i>Propionibacterium acnes</i> | 7,168       | 6,342       | 7,798       | 9,273       | 7,036       | 14,859      | 27,912      | 26,598      | 24,436      |
| <i>Streptococcus spp.</i>      | 1,529       | 9           | 18,718      | 22,973      | 263         | 1,120       | 1,170       | 22,567      | 770         |
| <i>Corynebacterium spp.</i>    | 28,986      | 2,847       | 29,856      | 2,543       | 3,430       | 16,634      | 3,466       | 2,088       | 45,665      |
| <i>Pseudomonas spp.</i>        | 3,422       | 753         | 824         | 1,351       | 1,158       | 1,553       | 586         | 1,214       | 54          |
| <b>Control</b>                 |             |             |             |             |             |             |             |             |             |
|                                | <b>M104</b> | <b>M109</b> | <b>M110</b> | <b>M112</b> | <b>M113</b> | <b>M114</b> | <b>M116</b> | <b>M117</b> | <b>M118</b> |
| <i>Staphylococcus spp.</i>     | 119,158     | 183,549     | 58,999      | 31,798      | 196,637     | 1,092       | 2,876       | 2,373       | 143,458     |
| <i>Neisseria spp.</i>          | 428         | 1,178       | 19          | 19          | 30          | 14          | 14          | 265         | 557         |
| <i>Propionibacterium acnes</i> | 225,325     | 55,847      | 22,985      | 94,999      | 69,044      | 3,506       | 951         | 22,617      | 10,295      |
| <i>Streptococcus spp.</i>      | 6,607       | 289,314     | 75          | 2,415       | 3,716       | 13          | 17          | 883         | 474         |
| <i>Corynebacterium spp.</i>    | 12,648      | 78,549      | 4,988       | 65,971      | 34,701      | 345         | 2,311       | 23,209      | 2,967       |
| <i>Pseudomonas spp.</i>        | 1,644       | 3,523       | 742         | 2,236       | 2,864       | 747         | 1,129       | 19,771      | 1,326       |

Table S2. Proportions of bacteria loads in all subjects using 16S bacterial rDNA analysis.

| <b>Case</b>                           |             |             |             |             |             |             |             |             |             |
|---------------------------------------|-------------|-------------|-------------|-------------|-------------|-------------|-------------|-------------|-------------|
|                                       | <b>M101</b> | <b>M102</b> | <b>M103</b> | <b>M105</b> | <b>M106</b> | <b>M107</b> | <b>M108</b> | <b>M111</b> | <b>M115</b> |
| <b><i>Staphylococcus spp.</i></b>     | 0.161999    | 0.23103     | 0.662912    | 0.101483    | 0.192352    | 0.106259    | 0.024556    | 0.080516    | 0.553588    |
| <b><i>Neisseria spp.</i></b>          | 0.780899    | 0.003155    | 0.018177    | 0.207041    | 0.210341    | 0.00305     | 0.837516    | 0.041404    | 0.0         |
| <b><i>Propionibacterium acnes</i></b> | 0.009958    | 0.488071    | 0.04348     | 0.177423    | 0.35355     | 0.387367    | 0.116191    | 0.44514     | 0.153804    |
| <b><i>Streptococcus spp.</i></b>      | 0.002124    | 0.000693    | 0.104367    | 0.439548    | 0.013215    | 0.029198    | 0.00487     | 0.377678    | 0.004846    |
| <b><i>Corynebacterium spp.</i></b>    | 0.040267    | 0.219101    | 0.16647     | 0.048656    | 0.172353    | 0.43364     | 0.014428    | 0.034944    | 0.287422    |
| <b><i>Pseudomonas spp.</i></b>        | 0.004754    | 0.05795     | 0.004594    | 0.025849    | 0.058188    | 0.040486    | 0.002439    | 0.020317    | 0.00034     |
| <b>Control</b>                        |             |             |             |             |             |             |             |             |             |
|                                       | <b>M104</b> | <b>M109</b> | <b>M110</b> | <b>M112</b> | <b>M113</b> | <b>M114</b> | <b>M116</b> | <b>M117</b> | <b>M118</b> |
| <b><i>Staphylococcus spp.</i></b>     | 0.325737    | 0.299936    | 0.671909    | 0.161053    | 0.640528    | 0.191009    | 0.394081    | 0.034333    | 0.901815    |
| <b><i>Neisseria spp.</i></b>          | 0.00117     | 0.001925    | 0.000216    | 9.62E-05    | 9.77E-05    | 0.002449    | 0.001918    | 0.003834    | 0.003501    |
| <b><i>Propionibacterium acnes</i></b> | 0.615962    | 0.091259    | 0.261764    | 0.481159    | 0.224905    | 0.613259    | 0.13031     | 0.327223    | 0.064717    |
| <b><i>Streptococcus spp.</i></b>      | 0.018061    | 0.472766    | 0.000854    | 0.012232    | 0.012105    | 0.002274    | 0.002329    | 0.012775    | 0.00298     |
| <b><i>Corynebacterium spp.</i></b>    | 0.034575    | 0.128356    | 0.056806    | 0.334135    | 0.113036    | 0.060346    | 0.316662    | 0.335788    | 0.018651    |
| <b><i>Pseudomonas spp.</i></b>        | 0.004494    | 0.005757    | 0.00845     | 0.011325    | 0.009329    | 0.130663    | 0.1547      | 0.286047    | 0.008336    |
